# Supplementary material for: Calix[6]arene functionalized lanthanide metal–organic frameworks with boosted performance in identifying an anti-epidemic pharmaceutical
Source: Royal Society of Chemistry journal article supplement (doi:10.1039/d2cc03564b), 2022-01-01
Supplement: d2cc03564b1.pdf [file d2cc03564b1.pdf]

1 **Supplementary Information**

2 **Calix[6]arene Functionalized Lanthanide Metal-**  
3 **Organic Frameworks with Boosted Performance on**  
4 **Identifying Anti-epidemic Pharmaceutical**

5 Lu-Dan Yu,<sup>a</sup> Yuan-Jun Tong,<sup>a</sup> Nan Li,<sup>a</sup> Yating Yang,<sup>a</sup> Pengfei Ye,<sup>a</sup> Gangfeng

6 Ouyang<sup>a,b,c</sup> Fang Zhu<sup>\*a</sup>

7 <sup>a</sup> MOE Key Laboratory of Bioinorganic and Synthetic Chemistry/KLGHEI of Environment and  
8 Energy Chemistry, School of Chemistry, Sun Yat-sen University, Guangzhou, 510275, China.

9 <sup>b</sup> Chemistry College, Center of Advanced Analysis and Gene Sequencing, Zhengzhou University,  
10 Kexue Avenue 100, Zhengzhou 450001.

11 <sup>c</sup> Guangdong Provincial Key Laboratory of Emergency Test for Dangerous Chemicals, Guangdong  
12 Institute of Analysis (China National Analytical Center Guangzhou), Guangdong Academy of  
13 Sciences, 100 Xianlie Middle Road, Guangzhou 510070, China.

14 \* Corresponding Author: F. Zhu, Email: ceszhf@sysu.edu.cn

15

## 16 1. Supplementary Experimental Section

17 **1.1 Materials and Reagents.** Carbon Mesh was purchased from Toray Industries, Inc (Japan),  
18  $\text{Tb}(\text{NO}_3)_3 \cdot 6\text{H}_2\text{O}$ , dimethylformamide (DMF), and all the other interfering compounds for *Prednis* detection  
19 experiments were purchased from Aladdin Reagent (Shanghai, China). All suspensions were prepared using  
20 ultrapure water (18.2 M $\Omega$  cm) from a Millipore Direct-Q system.

21 **1.2 Apparatus.** The UV-vis spectra were collected on an UV-2450 spectrophotometer (Shimadzu, Japan).  
22 Quanta 200 scanning electron microscopy (SEM, U.S.A.) was used to characterize the sizes and morphology.  
23 Fourier transform infrared (FT-IR) spectra were obtained using a Nicolet 5700 FT-IR spectrometer.  
24 Fluorescence spectra were performed on an F-97 Pro fluorescence spectrometer. The excitation wavelength,  
25 slit widths (including excitation and emission), and the photomultiplier tube (PMT) voltage were set at 290 nm,  
26 10 nm and 650 V, respectively. The X-ray photoelectron spectroscopy (XPS) spectra were recorded on powders  
27 with a Thermo ESCALAB 250 spectrometer using an Al Ka monochromator source ( $h\nu=1486.6$  eV) and a  
28 multidetection analyzer.

29 **1.3 Synthesis of Tb-BTC MOF and structurally modification of TB-Cx[6].** Tb-BTC was synthesized in  
30 a relatively mild way according to the method in the literature with a slight adjustment [1]. 1 g of  $\text{Tb}(\text{NO}_3)_3 \cdot 6\text{H}_2\text{O}$   
31 powder was mixed with 0.5 g of BTC and dissolved in 54 ml DMF mixed with 4 ml water. After stirring for 1 h,  
32 the mixture was treated at 100 °C for 12 h to obtain Tb-BTC suspension in DMF with underreacted ligands BTC  
33 and Tb metal ions. The mixture suspension above was centrifuged and washed by DMF, water and ethanol,  
34 respectively. Finally, the white powder of Tb-BTC was got from drying in vacuum oven at room temperature.  
35 The structure modification route of Tb-BTC was according to a literature procedure in which 100 mg of the Tb-  
36 BTC powder and 50 mg Cx[6] were mixed in 10 ml methylbenzene within a glass bottle and took sonication for  
37 1 h and left standing overnight. The solutions were filtered to get rid of parent solids. The solutions were dried  
38 at 150°C for 24 h under vacuum to obtain the final product TB-Cx[6] powder.

39 **1.4 Quantification determination of *Prednis* with TB-Cx[6] fluorescence probe.** Firstly, the TB-Cx[6]  
40 stock suspension was prepared by mixing 5 mg TB-Cx[6] to 5 mL ultrapure water under sonication for 3 min.  
41 Subsequently, the TB-Cx[6] suspension (50  $\mu\text{L}$ ) was respectively mixed with an aliquot of 200  $\mu\text{L}$  different  
42 concentrations of *Prednis* methanol solutions. The mixture above was diluted with ultrapure water to control the  
43 total volume 2000  $\mu\text{L}$ . The fluorescence spectra were measured with the excitation wavelength at 290 nm. The  
44  $\text{Tb}^{3+}$  fluorescence peak at 545 nm was measured for quantification.

45 **1.5 Selectivity of the assay to Prednis.** To assess the sensing selectivity of the TB-Cx[6] system for  
46 *Prednis*, potential interfering metal ions and were used to investigate the specificity of the *Prednis* assay under  
47 identical conditions. The concentration of *Prednis* is set at 100 ng/mL, and the level of other analytes is 5 folds  
48 than *Prednis*. The interference of other analytes is quite tiny, indicating that this fluorescence probe has high  
49 sensitivity and selectivity. It is worth noting that bare Tb-BTC for *Prednis* detection were disturbed by lots of  
50 analytes. This is due to the selective and efficient enrichment of *Prednis* into the solid material by Cx[6].

51 **1.6 Analysis of Prednis in real water samples.** To test the general applicability of TB-Cx[6] probe, standard  
52 addition method was performed on the water samples (river water and sea water) for our assay. Real samples  
53 of the Pearl River water were filtered through the 0.22  $\mu\text{m}$  cellulose acetate filters to remove insoluble impurities  
54 that may exist in the water. Subsequently, 350  $\mu\text{L}$  of the obtained water samples and 100  $\mu\text{L}$  of TB-Cx[6] probe  
55 were diluted to 700  $\mu\text{L}$  with deionized water. Subsequently, the mixture was used for performing fluorescent and  
56 L-MS measurements. The concentrations of *Prednis* in the tested water samples are presented in Table S1.

57 **1.7 Preparation of TF.** Firstly, the 20 mg solid TB-Cx[6] was added into 10 mL hexamethylene and then  
58 sonicated to around 30 mins. Then 40 mg PDMS was added into the above mixture. The mixed solution was  
59 strongly stirred and sonicated to obtain the suspension of TB-Cx[6]. Subsequently, a cleaned carbon mesh was  
60 fixed on the coating instrument (Figure S10) and the obtained TB-Cx[6] suspension was gradually dropped onto  
61 the carbon mesh surface. A round push rod rolls on the TF film to control the thickness and uniformity of the  
62 coating. Finally, the TF was obtained and dried for 30min at 85  $^{\circ}\text{C}$  under vacuum.

63 **1.8 Design of the TF equipped drone water sampler.** A drone of with automatic return function was  
64 purchased from Dajiang (Mavic Mini-DJI, Shenzhen, China). This drone was tested to have an additional lift  
65 capacity of 200 g and a flight range of 3000 m. The TB-Cx[6] TFs were fixed to the lower part of the buoyancy  
66 stents by clamps. The TB-Cx[6] TFs were all immersed into the water to a depth about 10 cm, when the drone  
67 was floating on water.

68 **1.9 Analysis of Prednis by TF.** As the universality and particularity of *Prednis*, as well as the uncertainty of  
69 nocuity in real samples, TFME drone water sampler was fabricated and used to analysis Pearl River Water.  
70 Two TB-Cx[6] membranes were equipped onto the drone sampler. The drone was then lifted off from a stent  
71 placed on the deck and flown toward real-water. After touching down on the surface of the water the membranes  
72 were all immersed into the water by gravity. The drone was then allowed to sit on the surface of the water for  
73 10 min of sampling. After sampling, the TF is taken out and dried, and then the fluorescence test is performed.  
74 The concentrations of *Prednis* in the tested real water is presented in Table S2.



76

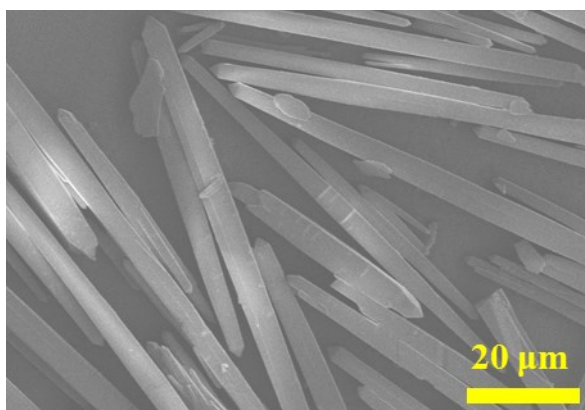

77

78

79

80

**Figure S1.** SEM image of bare Tb-BTC MOF

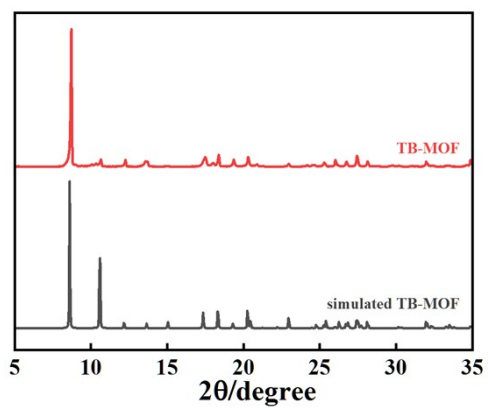

81

82

83

**Figure S2.** XRD pattern of TB-MOF and simulated TB-MOF

84

85

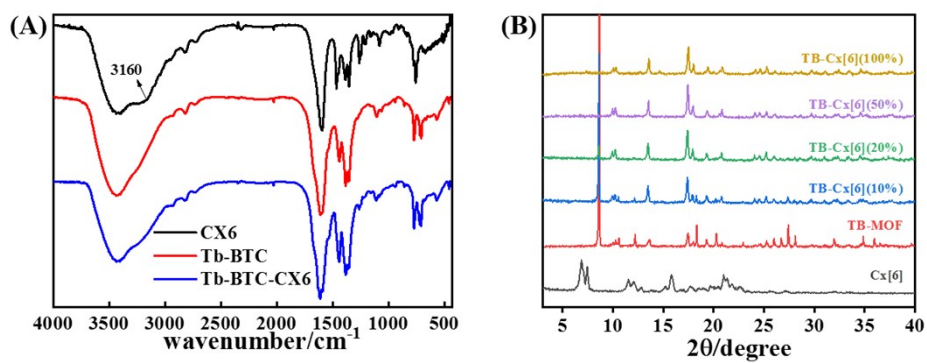

86

87

88 **Figure S3.** (A) FTIR and (B)XRD spectra of Cx[6], Tb-BTC and TB-Cx[6] adding different amounts of Cx[6],

89

respectively

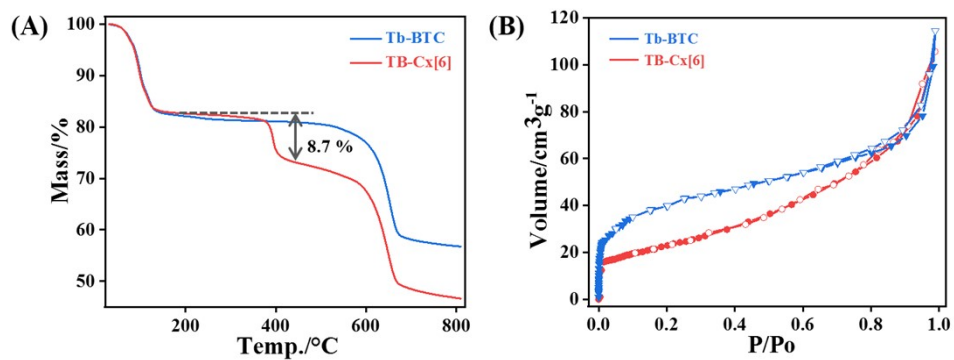

91

92

**Figure S4.** (A) TGA curves and (B) BET pattern of Tb-BTC and TB-Cx[6]. The TGA was performed at temperature ranged 30 to 800 °C, heating rate was 10°C/min, and the atmosphere is nitrogen.

93

94



95

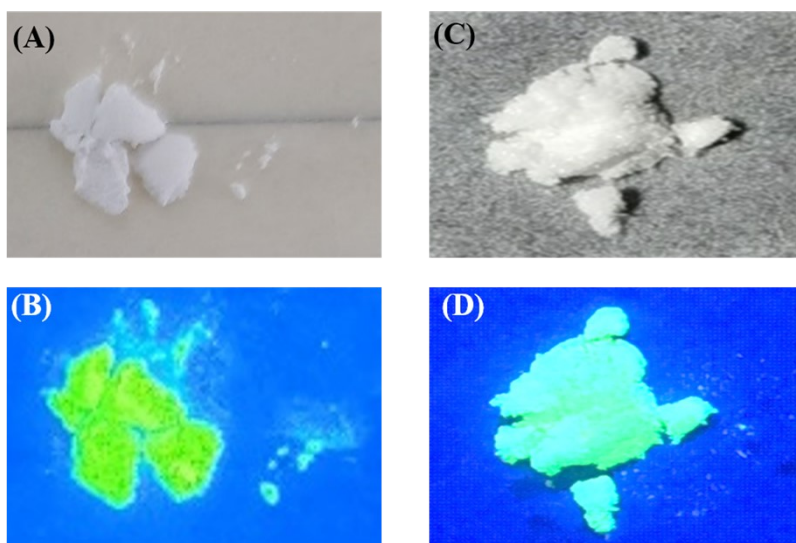

96

97 **Figure S5.** Photos of Tb-BTC under (A) sunlight and (B) UV light (254 nm). Photos of TB- Cx[6] under (C)

98

sunlight and (D) UV light (254 nm)

99

100  
101

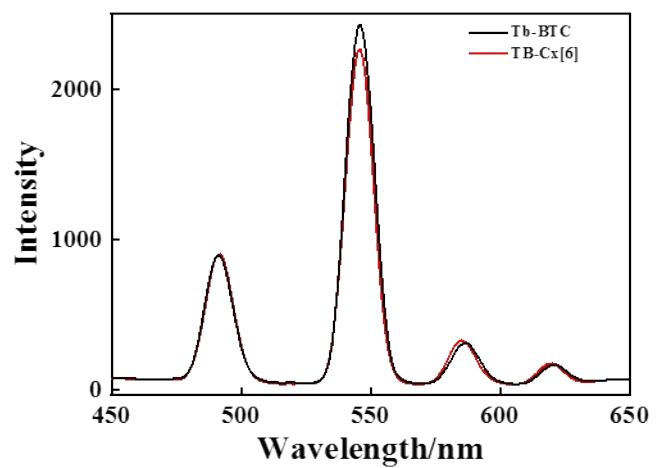

102  
103  
104

**Figure S6.** Fluorescent spectra of Tb-BTC and TB- Cx[6].

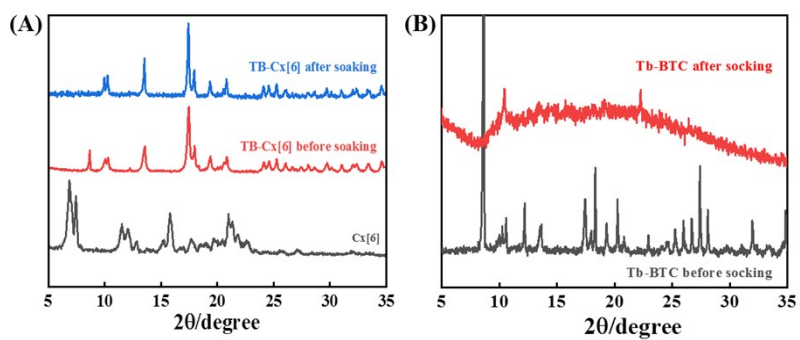

105

106

107 **Figure S7.** XRD pattern of TB- Cx[6] (A) and Tb-BTC (B) before and after soaking in water for 15 days.

108

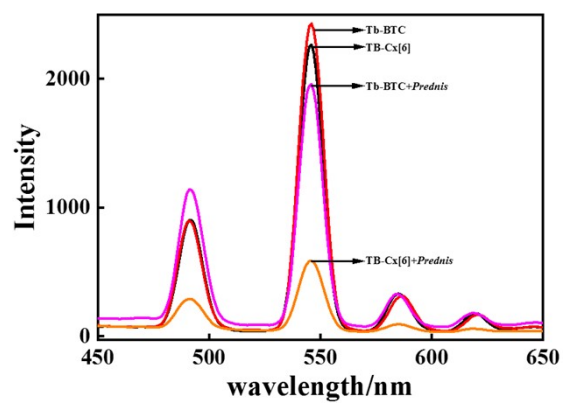

109

110 **Figure S8.** Fluorescence spectra of Tb-BTC, TB- Cx[6], Tb-BTC and TB- Cx[6] with 1000 ng/mL *Prednis*

111 respectively.

112

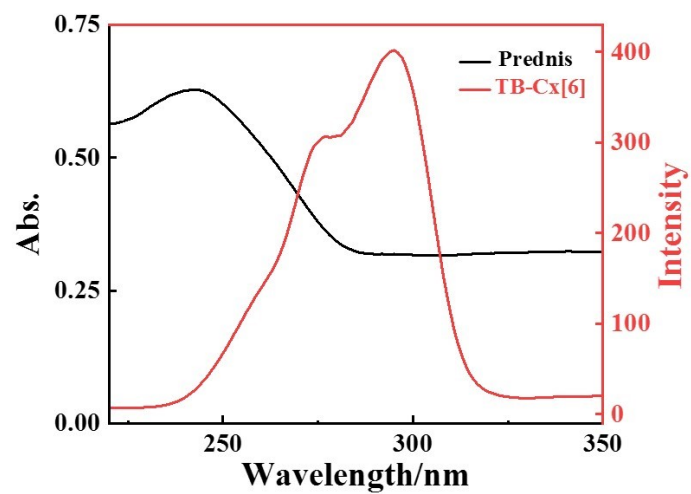

113

114 **Figure S9** Ultraviolet absorption spectrum of *Prednis* and fluorescence emission spectrum of TB-Cx[6].

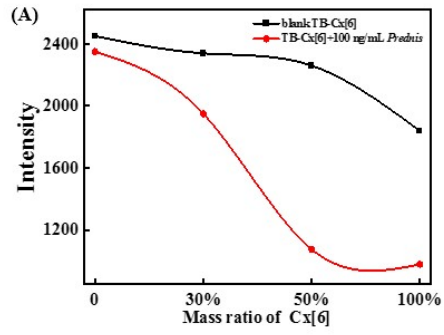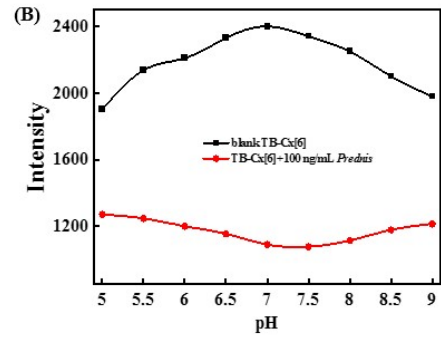

116

117 **Figure S10.** (A) Effects of Cx[6] contents for *Prednis* analysis. (B) Effects of different pH before and after addition

118 of 1000 ng/mL *Prednis*.

119

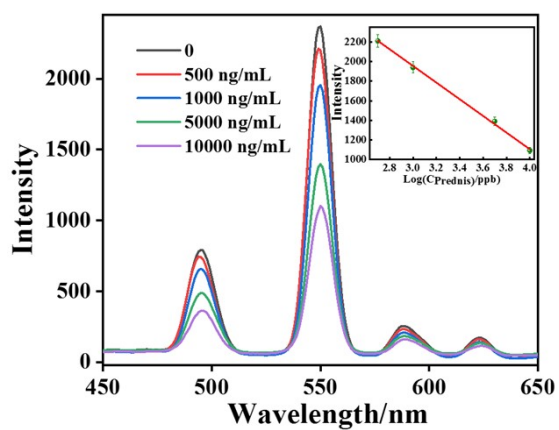

120

121 Figure S11 Fluorescence intensity curves of the Tb-BTC MOF fluorescent probe with different concentrations of

122 *Prednis*.

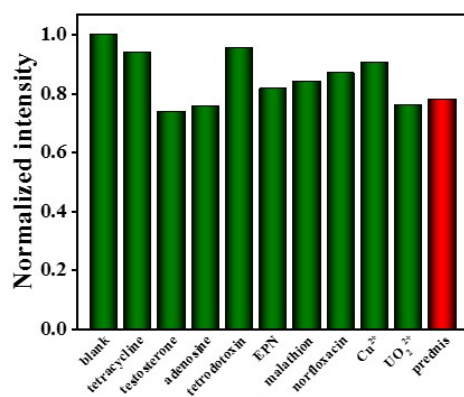

124

125 **Figure S12.** Selectivity assay of Tb-BTC to *Prednis* in the presence of various interfering species (tetracycline,  
126 tetrodotoxin, adenosine, 2-deoxyadenosine (EPN), malathion, norfloxacin, Cu<sup>2+</sup> and UO<sub>2</sub><sup>2+</sup>). The concentration  
127 of *Prednis* was 100 ng/mL, the concentration of each interfering species was 5 times of *Prednis*.



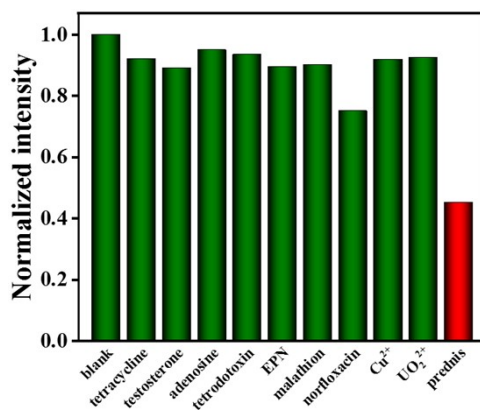

129

130 **Figure S13.** Selectivity assay of TB-Cx[6] to *Prednis* in the presence of various interfering species (tetracycline,  
131 tetrodotoxin, adenosine, 2-deoxyadenosine(EPN), malathion, norfloxacin, Cu<sup>2+</sup> and UO<sub>2</sub><sup>2+</sup>). The concentration  
132 of *Prednis* was 100 ng/mL, the concentration of each interfering species was 5 times of *Prednis*.

133

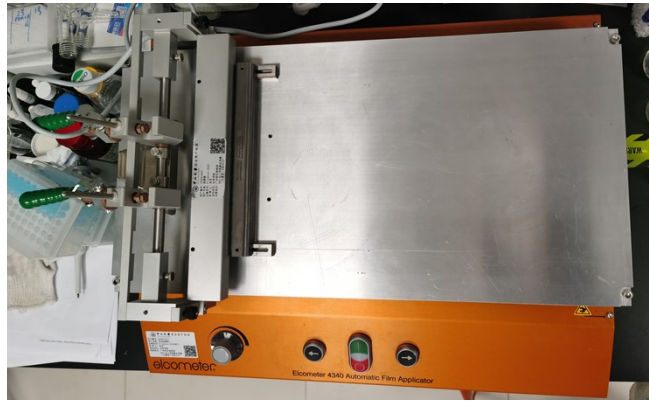

134  
135  
136

**Figure S14.** Coating machine for making TF.

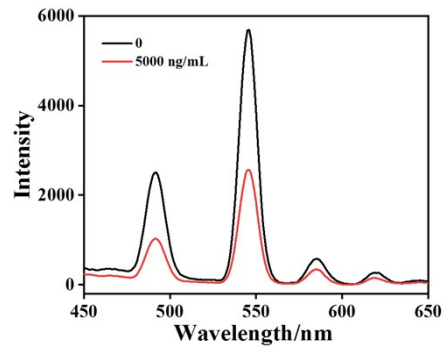

137

138 **Figure S15.** The spectra of TB-Cx[6] thin film after immersed into simulated sea water with different  
139 concentration of *Prednis*

140

141 **Table S1.** Detection *Prednis* in Pearl river water samples by using TB-Cx[6], TF and LC-MS.

| methods  | Spiked<br>(ng/mL) | Detected<br>(ng/mL) | Recovery<br>(%) | RSD (n=5) | LC-MS<br>(ng/mL) | Consistency<br>(%) |
|----------|-------------------|---------------------|-----------------|-----------|------------------|--------------------|
| TB-Cx[6] | 0                 | ND                  | -               | 6.7%      | -                | -                  |
|          | 10.0              | 11.4                | 114.0           | 8.1%      | 10.7             | 106.5              |
|          | 50.0              | 51.7                | 103.4           | 5.9%      | 50.9             | 101.5              |
| TF       | 0                 | ND                  | -               | 6.5%      | -                | -                  |
|          | 10.0              | 11.8                | 118.0           | 7.8%      | 10.7             | 110.3              |
|          | 50.0              | 52.7                | 105.4           | 5.3%      | 50.9             | 103.5              |

142 ND indicated not detected. Consistency =  $C_{\text{Fluorescence}} / C_{\text{(LC-MS)}} \times 100\%$

143

144

145 **Table S2.** Detection *Prednis* in simulated sea water<sup>a</sup> by using TF.

| methods | Spiked<br>(ng/mL) | Detected<br>(ng/mL) | Recovery<br>(%) | RSD (n=3) | LC-MS<br>(ng/mL) | Consistency<br>(%) |
|---------|-------------------|---------------------|-----------------|-----------|------------------|--------------------|
| TF      | 5000.0            | 5397                | 108.0           | 7.4%      | 5242             | 103.0              |

146 a: Simulated seawater was prepared in accord with the main constituents of real seawater as specified in

147 Table S3 (China Petroleum Processing and Petrochemical Technology, 2022, 24, 91-100).

148

149 **Table S3.** Main constituents of simulated seawater as used in the study

| Main component                 | Percentage salt (%) | Concentration (g/L) |
|--------------------------------|---------------------|---------------------|
| NaCl                           | 77.76               | 27.2                |
| MgCl <sub>2</sub>              | 10.88               | 3.80                |
| MgSO <sub>4</sub>              | 4.38                | 1.70                |
| CaSO <sub>4</sub>              | 3.60                | 1.20                |
| K <sub>2</sub> SO <sub>4</sub> | 2.47                | 0.90                |
| CaCO <sub>3</sub>              | 0.35                | 0.10                |

150
